# Supplementary material for: Comparing the Recombinant Protein Production Potential of Planktonic and Biofilm Cells
Source: MDPI journal article supplement (doi:10.3390/microorganisms6020048), 2018-05-24
Supplement: s1 [file s1]

Supplementary Material

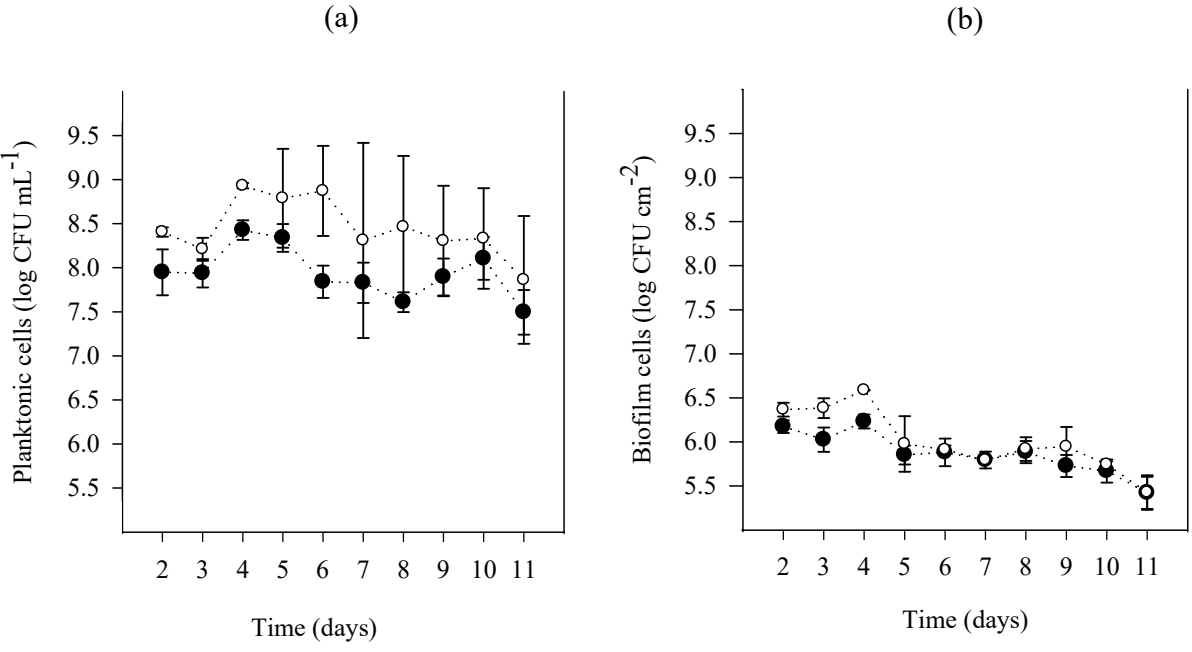

**Figure S1.** Planktonic (a) and biofilm (b) population dynamics of plasmid-bearing cells (●) and total culturable cells (plasmid-bearing cells plus plasmid-free cells) (○). The means ± SDs for three independent experiments are illustrated.
